# Supplementary figures and images for: A lab-on-a-chip system integrating DNA purification and loop-mediated isothermal amplification for the quantification of the toxic diatom Pseudo-nitzschia multistriata
Source: Royal Society of Chemistry journal article supplement (doi:10.1039/d5sd00135h), 2025-10-31

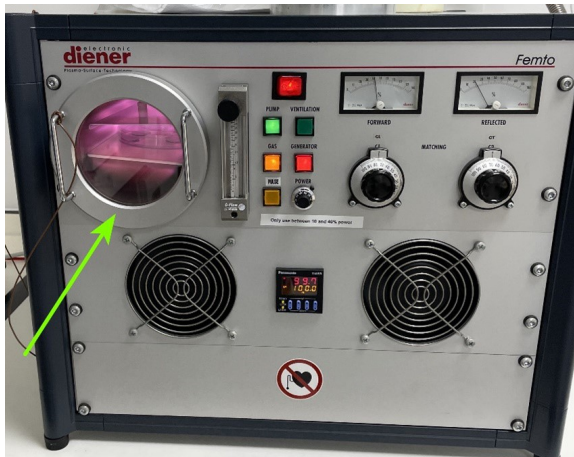

Supplement: d5sd00135h4.pdf [file d5sd00135h4.pdf]

**A**

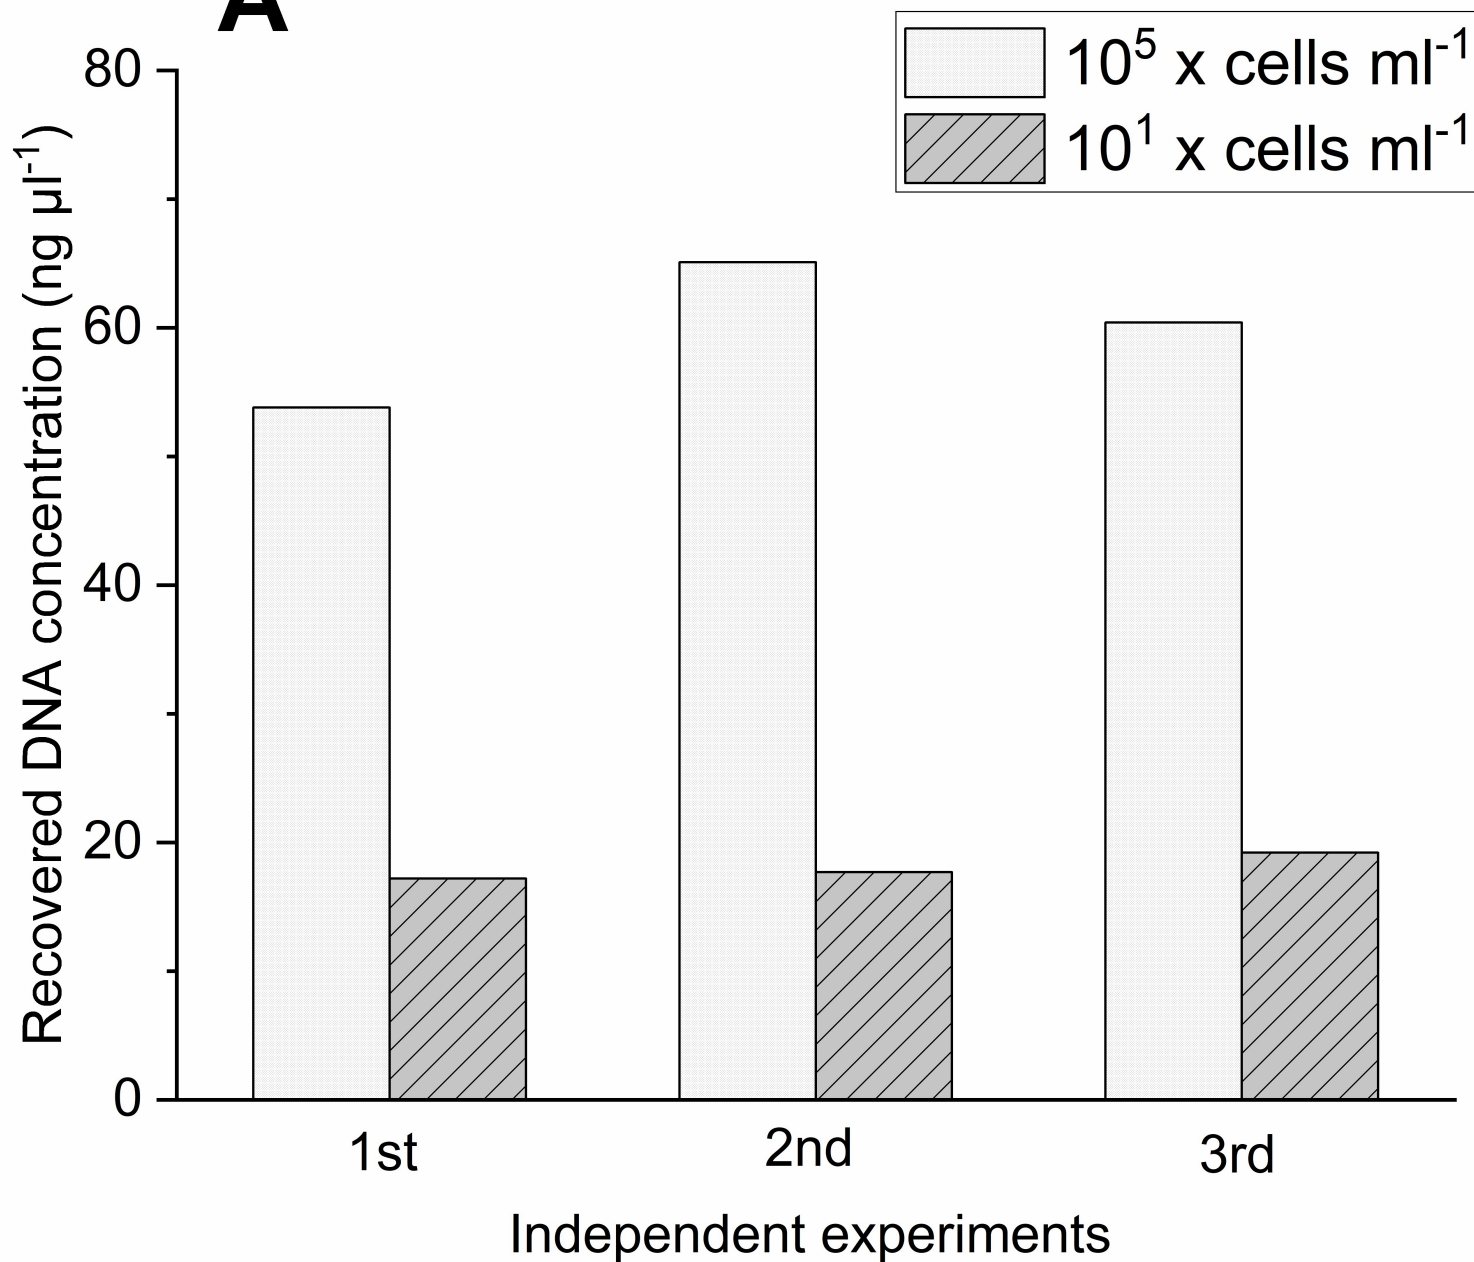

Supplement: d5sd00135h7.pdf [file d5sd00135h7.pdf]

**B**

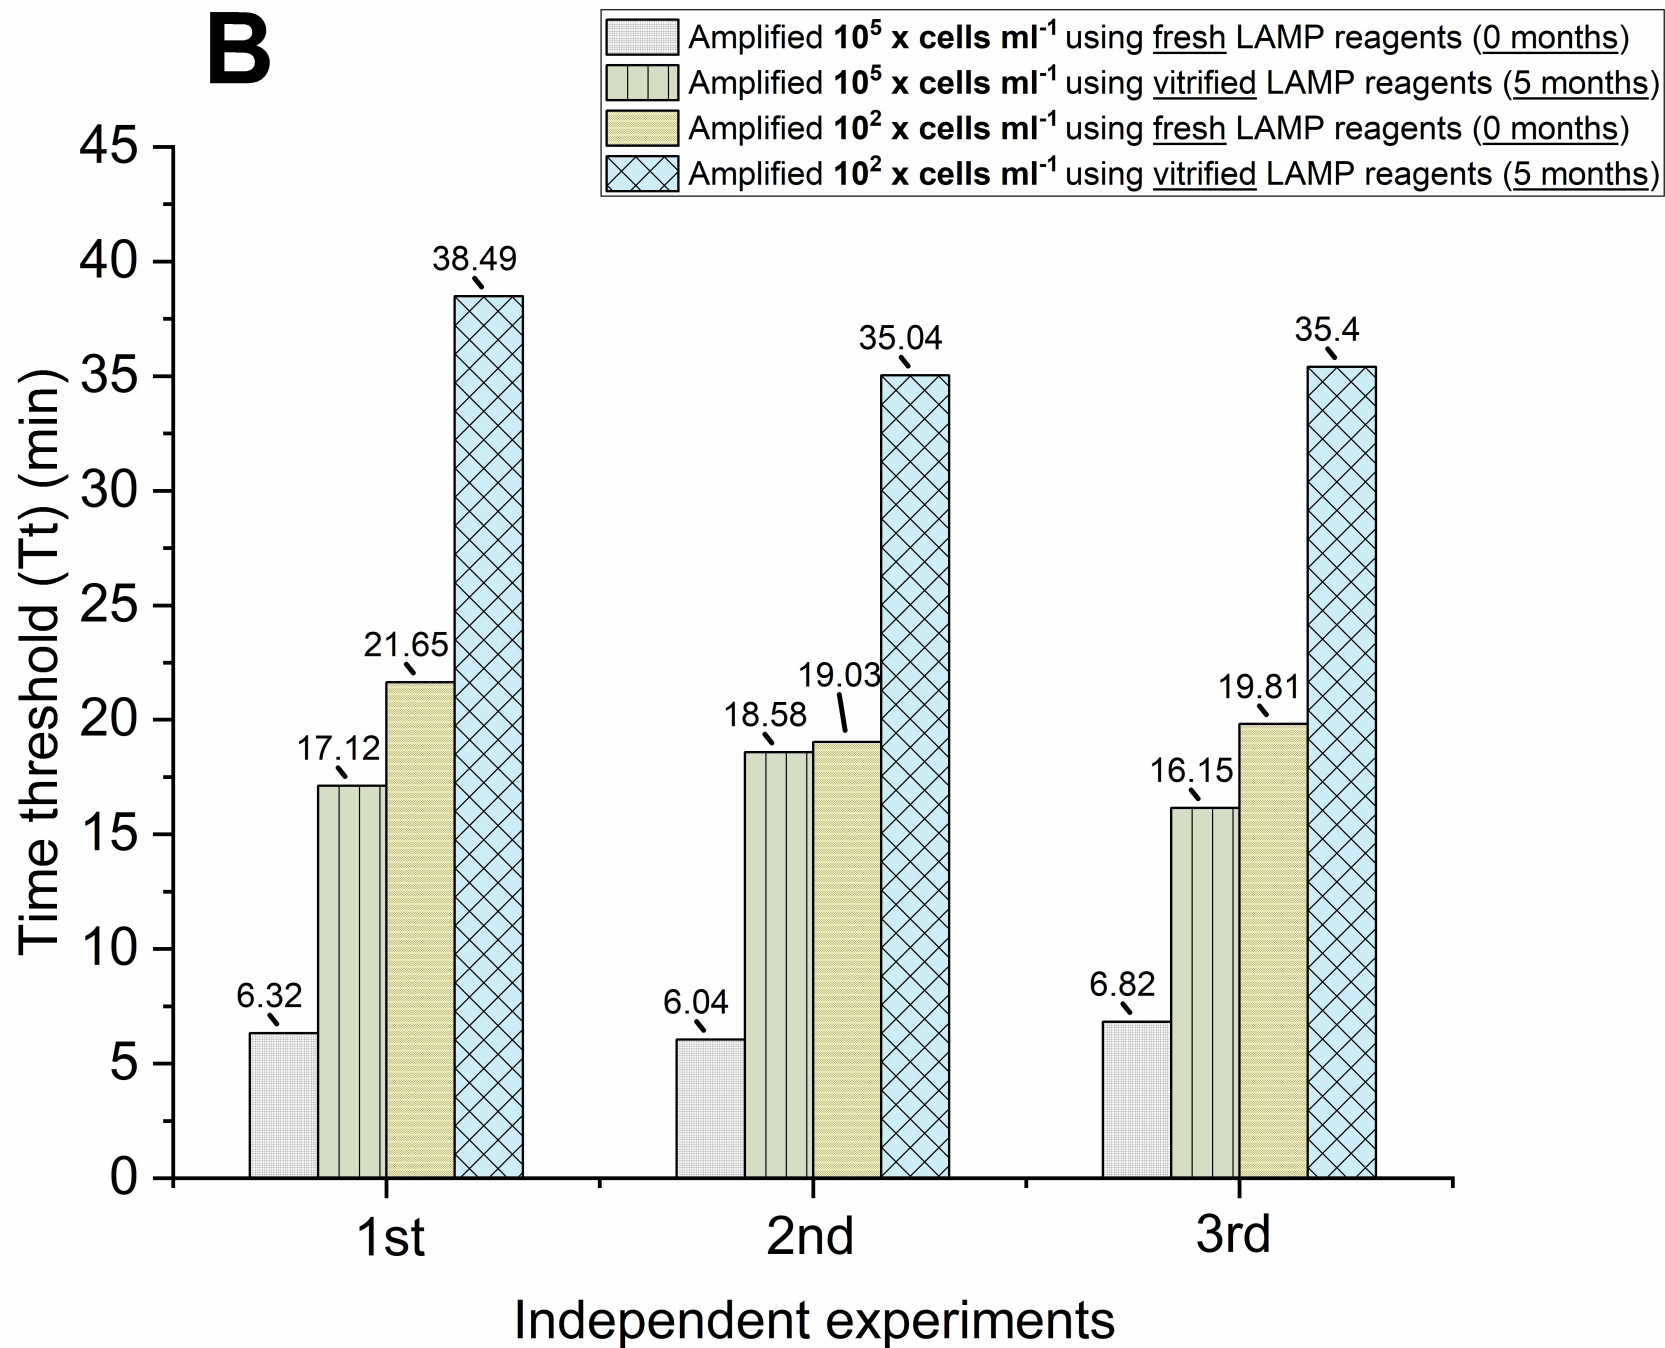

Supplement: d5sd00135h8.pdf [file d5sd00135h8.pdf]
